# Supplementary material for: Genomic predictions for growth and feed effeciency traits in duck breeding populations
Source: Research Square preprint supplement (doi:10.21203/rs.3.rs-6694626/v1), 2025-06-19
Supplement: Supplementary file 1 [file 55291943495c7378382b817b.xlsx]

## Sheet: TableS1
Table S1. The breeding population of ducks
Generation	All individuals			Genotyped individuals
	Individuals	Female	Male	Individuals	Female	Male
1	3879	1945	1934
2	6060	3310	2750
3	5389	2887	2502
4	5622	3002	2620
5	6540	3272	3268
6	6213	3240	2973
7	3721	1882	1839
8	6434	3181	3253	1139	946	193
9	4987	2531	2456	1059	852	207
10	3765	1948	1817	581	401	180
Total	52610	27198	25412	2779	2199	580

## Sheet: TableS2
Table S2 Heritability estimates and variance components across 12 traits using three models.
Traits	Abbreviations	Animal model				Maternal genetic effects model					Maternal environment effects model
		Additive	Environmental	Heritability	SE	Additive	Maternal environmental	Environmental	Heritability	SE	Additive	Maternal genetic	Environmental	Heritability	SE
Body weight at 14 days	BW14	0.385626	0.614374	0.385626	0.0108033	0.212087	0.0974878	0.690426	0.309574	0.0236414	0.209637	0.124447	0.665916	0.209637	0.0134671
Body weight at 42 days	BW42	0.494844	0.505156	0.494844	0.0119084	0.430058	0.0298626	0.54008	0.45992	0.0284001	0.446574	0.0291713	0.524255	0.446574	0.0142011
Weight gain between 42 and 14 days	WG	0.421441	0.578559	0.421441	0.0124456	0.360564	0.0232309	0.616205	0.383795	0.027374	0.391584	0.014701	0.593715	0.391584	0.0143415
Metabolic weight	MW	0.506042	0.493958	0.506042	0.0119101	0.422474	0.0429892	0.534537	0.465463	0.0293942	0.435885	0.0471279	0.516987	0.435885	0.0148304
Breast muscle weight	BMW	0.155179	0.844821	0.155179	0.00869547	0.103357	0.0358759	0.860767	0.139233	0.0164952	0.126564	0.0220253	0.851411	0.126564	0.00917186
Keel length	KL	0.212199	0.787801	0.212199	0.0101368	0.151188	0.0363738	0.812439	0.187561	0.0179542	0.181421	0.0213519	0.797227	0.181421	0.0109804
Breast muscle thickness	BMT	0.209998	0.790002	0.209998	0.00968521	0.17986	0.0172711	0.802869	0.197131	0.0192663	0.184345	0.0155655	0.800089	0.184345	0.0110856
Breast muscle volume	BMV	0.223948	0.776052	0.223948	0.00997564	0.180606	0.0242291	0.795164	0.204836	0.0194271	0.191758	0.0199311	0.788311	0.191758	0.0113741
Feed intake	FI	0.352428	0.647572	0.352428	0.0110808	0.284861	0.0318207	0.683318	0.316682	0.0230471	0.301613	0.0293533	0.669033	0.301613	0.013303
Feed conversation rate	FCR	0.261825	0.738175	0.261825	0.0104329	0.237096	0.00971439	0.753189	0.24681	0.024144	0.250857	0.00484776	0.744296	0.250857	0.012435
Resedual feed intake1	RFI1	0.289512	0.710488	0.289512	0.0103415	0.245288	0.0199714	0.73474	0.26526	0.0232214	0.259665	0.0157146	0.724621	0.259665	0.0125178
Resedual feed intake2	RFI2	0.307877	0.692123	0.307877	0.011	0.263962	0.0243795	0.711659	0.288341	0.0254341	0.269899	0.0233306	0.706771	0.269899	0.01379

## Sheet: TableS3
Table S3 Genetic and phenotype correlations for the 12 traits
Trait	BW14	BW42	WG	MW	BMW	KL	BMT	BMV	FCR	FI	RFI1	RFI2
BW14		0.634749	0.46794	0.742376	0.286221	0.335379	0.260341	0.371204	0.212491	0.642733	0.412449	0.450472
BW42	0.398099		0.980632	0.988809	0.744042	0.625522	0.439078	0.703995	-0.404185	0.609149	-0.0178018	-0.027561
WG	0.161833	0.96961		0.939341	0.344826	0.458832	0.238112	0.450835	-0.47567	0.582664	-0.561639	-0.145263
MW	0.574013	0.979558	0.901174		0.362882	0.485802	0.282349	0.496732	-0.352531	0.605324	-0.301364	-0.320909
BMW	0.159118	0.381451	0.732374	0.686396		0.629239	0.428126	0.777049	-0.178223	0.144855	-0.147045	-0.154746
KL	0.220929	0.501046	0.578738	0.60066	0.347342		0.218541	0.65389	-0.19547	0.241269	-0.0280819	-0.0333382
BMT	0.168552	0.273392	0.431625	0.433471	0.165699	0.11226		0.848506	-0.0785613	0.267445	0.075676	0.0399483
BMV	0.254843	0.502835	0.682058	0.681312	0.605567	0.560132	0.809864		-0.178927	0.313355	-0.0061084	-0.0956218
FCR	0.0953682	-0.415924	-0.509644	-0.311278	-0.448914	-0.230651	-0.130506	-0.291235		0.345878	0.876358	0.892397
FI	0.258181	0.724485	0.637095	0.756327	0.353223	0.325487	0.322693	0.418282	0.294799		0.687175	0.764403
RFI1	0.155879	-0.127513	-0.235382	-0.11103	-0.0845334	-0.0679384	0.0995102	0.0107496	0.839161	0.697968		0.99819
RFI2	0.176591	-0.170853	-0.243948	-0.121406	-0.0981841	-0.0885391	0.0672114	-0.0227711	0.862014	0.73475	0.998012
Note: Numbers in upper right and ower left corners are genetic and phenotypic correlations, respectively. Body weight weighted at 14: BW14. Body weight weighted at 42 days: BW42. Feed intake: FI. Feed conversion ratio: FCR). Breast muscle width: BMW. Keel length: KL. Breast muscle thickness: BMT. Breast muscle volume:BMV. Average daily gain during 14 and 42 days: ADG14-42. Metabolic weight: MW. R…

## Sheet: TableS4
Table S4 Genomic prediction by pruning markers based on various linkage disequilibrium (LD) thesholds.
Traits	Abbreviations	All WGS marker		LD<0.8				LD<0.6				LD<0.4				LD<0.2				LD<0.1				LD<0.075				LD<0.05				LD<0.025				LD<0.01
		Reliability	SD	LD pruning	CV SD	Permutation	Perm SD	LD pruning	CV SD	Permutation	Perm SD	LD pruning	CV SD	Permutation	Perm SD	LD pruning	CV SD	Permutation	Perm SD	LD pruning	CV SD	Permutation	Perm SD	LD pruning	CV SD	Permutation	Perm SD	LD pruning	CV SD	Permutation	Perm SD	LD pruning	CV SD	Permutation	Perm SD	LD pruning	CV SD	Permutation	Perm SD
Body weight at 14 days	BW14	0.316354	0.0323166	0.316598	0.032194	0.316287	0.000181963	0.318055	0.0317331	0.316361	0.000285931	0.332629	0.03275	0.316336	0.000564909	0.35728	0.0387489	0.315633	0.00209454	0.375771	0.0436003	0.31346	0.00324977	0.380442	0.0417219	0.311654	0.00494646	0.379037	0.0370659	0.308145	0.00518914	0.35595	0.0308502	0.300684	0.00635233	0.321568	0.0345041	0.29194	0.00621479
Body weight at 42 days	BW42	0.246457	0.0494375	0.247329	0.0512678	0.246364	0.000211951	0.249076	0.0518992	0.246382	0.000294645	0.258398	0.0522927	0.246371	0.000851978	0.268934	0.0479614	0.2462	0.0015779	0.275587	0.0438005	0.243753	0.00270051	0.280498	0.0342696	0.242349	0.00362649	0.283261	0.0356877	0.240841	0.00349524	0.280284	0.0340811	0.236997	0.00587239	0.251768	0.0301643	0.227964	0.00844845
Weight gain between 42 and 14 days	WG	0.236877	0.0467557	0.238984	0.048245	0.236795	0.000239244	0.241937	0.0488202	0.236811	0.000365596	0.256605	0.0458295	0.236741	0.000720223	0.274813	0.0474714	0.236319	0.00224247	0.28179	0.0500994	0.233952	0.00329213	0.284075	0.0446032	0.232652	0.00352002	0.279407	0.0439123	0.23045	0.00483494	0.277896	0.0461408	0.225717	0.0082851	0.249481	0.039096	0.215971	0.00892251
Metabolic weight	MW	0.259217	0.048263	0.25945	0.0475197	0.259145	0.000358376	0.260463	0.0473932	0.259174	0.00049937	0.266936	0.046547	0.259191	0.00083193	0.272842	0.0488124	0.259073	0.00165222	0.280351	0.0439864	0.256625	0.00373504	0.286635	0.0433138	0.25514	0.00472634	0.293406	0.0444027	0.253599	0.0054975	0.287135	0.0506108	0.249652	0.00713374	0.25692	0.0428777	0.241187	0.0087378
Breast muscle weight	BMW	0.394827	0.0341354	0.393445	0.0332443	0.394656	0.000229415	0.394893	0.032958	0.394654	0.000280039	0.419413	0.0340838	0.394683	0.000687388	0.442428	0.0282004	0.39406	0.00171397	0.446894	0.0252777	0.391744	0.0032859	0.439074	0.0236185	0.390607	0.00426262	0.441693	0.0228615	0.389407	0.00443831	0.426403	0.0363515	0.383682	0.0043201	0.404575	0.0353364	0.37375	0.00695682
Keel length	KL	0.281107	0.0399413	0.280433	0.0393359	0.281107	0.000196919	0.281266	0.0394333	0.28106	0.00022851	0.295821	0.0370924	0.281048	0.000520285	0.323689	0.0363299	0.280433	0.00170633	0.3401	0.0357643	0.280069	0.00303059	0.338086	0.0364887	0.279435	0.00312408	0.338649	0.0438093	0.279033	0.00418517	0.316067	0.042475	0.275231	0.0053779	0.289907	0.04246	0.267751	0.00799263
Breast muscle thickness	BMT	0.16403	0.0220433	0.16407	0.0207327	0.164022	0.000195397	0.164897	0.0202528	0.163969	0.000328999	0.175894	0.0220313	0.163799	0.000470573	0.210414	0.0268163	0.163447	0.00149098	0.236229	0.013811	0.162753	0.00279151	0.252063	0.015177	0.161847	0.00348852	0.244362	0.0256902	0.160988	0.00415052	0.215178	0.0286423	0.159093	0.00524131	0.187388	0.0285757	0.15646	0.00693634
Breast muscle volume	BMV	0.214366	0.037612	0.213691	0.0376883	0.21431	0.000244756	0.215295	0.0377545	0.214313	0.000378666	0.242909	0.0348667	0.214207	0.00075286	0.290835	0.0340521	0.213799	0.0020017	0.320237	0.0290282	0.212726	0.00346714	0.329053	0.029032	0.211577	0.00410887	0.327184	0.0281016	0.210759	0.00487881	0.28968	0.0145064	0.206926	0.00412702	0.249448	0.0218269	0.199543	0.00778896
Feed intake	FI	0.49766	0.043406	0.495543	0.0437174	0.497678	0.000270695	0.495027	0.0437747	0.497629	0.000430256	0.512007	0.0423454	0.497267	0.000943473	0.540429	0.0418663	0.495367	0.00227822	0.558272	0.0434996	0.490876	0.00338855	0.554086	0.0349263	0.488276	0.00419073	0.555451	0.0331894	0.483789	0.00574077	0.53244	0.0430706	0.475672	0.00985569	0.488599	0.0380364	0.465111	0.00989599
Feed conversation rate	FCR	0.294064	0.0525447	0.293339	0.0540338	0.294079	0.000237694	0.293092	0.0544755	0.294064	0.000305731	0.304353	0.0502751	0.29422	0.00061505	0.313368	0.0517538	0.29409	0.00195505	0.317598	0.0532649	0.292353	0.00325173	0.316409	0.049975	0.292054	0.00332761	0.31168	0.0491519	0.289116	0.00436598	0.309346	0.0451133	0.286951	0.00712532	0.298628	0.0365053	0.28157	0.00829865
Resedual feed intake1	RFI1	0.370778	0.0481477	0.368995	0.0481607	0.370657	0.000191812	0.368057	0.0482279	0.37064	0.000231996	0.377104	0.0502006	0.370817	0.000755392	0.388624	0.0513995	0.370648	0.00150039	0.393663	0.050788	0.369435	0.00163946	0.390193	0.0470139	0.369345	0.00281289	0.382413	0.0447818	0.366404	0.00316474	0.381744	0.045909	0.363795	0.00485109	0.374296	0.0466629	0.359025	0.00587311
Resedual feed intake2	RFI2	0.387006	0.0491808	0.385158	0.0492076	0.386875	0.000196603	0.384381	0.0493361	0.386845	0.000222618	0.395134	0.0514621	0.387038	0.000737037	0.409806	0.0517882	0.386791	0.00146577	0.4162	0.0504805	0.385547	0.00162029	0.413285	0.0474681	0.385318	0.00267639	0.404552	0.0456864	0.382417	0.00345744	0.400458	0.0484046	0.379364	0.00472487	0.394437	0.051921	0.374644	0.00552851
	Average	0.305229	0.041982	0.304753	0.0421123	0.305165	0.000229569	0.305536	0.0421715	0.305159	0.00032103	0.319767	0.041648	0.305143	0.000704258	0.341122	0.0421	0.304655	0.00180663	0.353558	0.0402834	0.302774	0.00295438	0.355325	0.0373007	0.301688	0.00373425	0.353425	0.0378617	0.299579	0.00444988	0.339382	0.0388463	0.295314	0.00610557	0.313918	0.0373306	0.28791	0.00763288
Note: CV SD represents the standard deviations of five fold cross validation for each trait. Perm SD represents the standard deviations of 20 times of permutation test.

## Sheet: TableS5
Table S5. The predictive reliability of GS for duck growth and feed effciency traits using Bayesian models.
Category	Traits	GBLUP*		BayesB		BayesC		BayesR		BayesS		BayesN
		Reliability	SD	Reliability	SD	Reliability	SD	Reliability	SD	Reliability	SD	Reliability	SD
Weight & Growth	BW14	0.38	0.0417219	0.376	0.0448193	0.38	0.0436305	0.38	0.0455695	0.376	0.044938	0.345	0.0512439
	BW42	0.28	0.0342696	0.274	0.0330674	0.277	0.0356364	0.278	0.035111	0.277	0.0349822	0.263	0.038308
	WG	0.284	0.0446032	0.283	0.044899	0.285	0.0437428	0.283	0.046247	0.281	0.0478868	0.278	0.0523227
	MW	0.287	0.0433138	0.281	0.0456232	0.289	0.0451171	0.287	0.0444201	0.283	0.0453491	0.264	0.0465819
Breast morphological	BMW	0.439	0.0236185	0.439	0.0257302	0.44	0.022388	0.441	0.0223991	0.44	0.0225324	0.419	0.0236831
	KL	0.338	0.0364887	0.336	0.0462875	0.339	0.0396761	0.34	0.0387218	0.338	0.0405631	0.333	0.0470044
	BMT	0.252	0.015177	0.248	0.0202285	0.252	0.0218708	0.253	0.0194934	0.25	0.021186	0.205	0.0174184
	BMV	0.329	0.029032	0.324	0.0305626	0.327	0.0316269	0.326	0.0317171	0.327	0.0293146	0.28	0.0524947
Feed efficiency	FI	0.316	0.0349263	0.312	0.0388696	0.316	0.0358938	0.317	0.0346017	0.314	0.0405674	0.295	0.0418759
	FCR	0.554	0.049975	0.545	0.0530851	0.55	0.0512035	0.551	0.0500093	0.546	0.0511484	0.532	0.0592268
	RFI1	0.39	0.0470139	0.384	0.048344	0.389	0.0480275	0.39	0.0468909	0.382	0.0468403	0.364	0.0465487
	RFI2	0.413	0.0474681	0.405	0.0504662	0.412	0.0494709	0.413	0.0480317	0.407	0.0486027	0.388	0.0466414
Average		0.355	0.0373007	0.351	0.0401652	0.354667	0.0390237	0.354917	0.0386011	0.35175	0.0394926	0.3305	0.0436125
*Note: The GBLUP and five Bayesian models were conducted using LD pruning (r^2≤0.075) genotype panel (168K).
SD represents the standard deviations of five fold cross validation for each trait.

## Sheet: TableS6
Table S6 Genomic prediction by pruning markers based on various Hardy-Weinberg equilibrium (HWE) thesholds.
		All WGS marker		P-value<0.5				P-value<0.1				P-value<0.01				P-value<1e-4				P-value<1E-6				P-value<1E-8				P-value<1E-10				P-value<1E-13				P-value<1E-16				P-value<1E-20				P-value<1E-30				P-value<1E-40
	Variants Number	10349420		7615				17785				27258				40529				50930				62823				81784				137922				242563				470932				1376179				2433787
Traits	Abbreviations	No HWE filtering	SD	HWE filtering	HWE SD	Pernutation	Perm SD	HWE filtering	HWE SD	Pernutation	Perm SD	HWE filtering	HWE SD	Pernutation	Perm SD	HWE filtering	HWE SD	Pernutation	Perm SD	HWE filtering	HWE SD	Pernutation	Perm SD	HWE filtering	HWE SD	Pernutation	Perm SD	HWE filtering	HWE SD	Pernutation	Perm SD	HWE filtering	HWE SD	Pernutation	Perm SD	HWE filtering	HWE SD	Pernutation	Perm SD	HWE filtering	HWE SD	Pernutation	Perm SD	HWE filtering	HWE SD	Pernutation	Perm SD	HWE filtering	HWE SD
Body weight at 14 days	BW14	0.316354	0.0323166	0.230639	0.0361561	0.262126	0.0110167	0.252138	0.0288144	0.283296	0.00787533	0.264176	0.0427167	0.292001	0.0060947	0.27612	0.0397275	0.297543	0.006203	0.29128	0.0345875	0.299873	0.00619451	0.299157	0.0321899	0.302209	0.00700479	0.30896	0.0308047	0.306322	0.0062122	0.302576	0.0339813	0.310637	0.00507753	0.29309	0.0330544	0.313454	0.0031657	0.279432	0.0352198	0.314609	0.00210524	0.271478	0.0375367	0.316231	0.00146486	0.27385	0.0385369
Body weight at 42 days	BW42	0.246457	0.0494375	0.159878	0.0476733	0.195867	0.0109952	0.180169	0.0378615	0.218766	0.0101015	0.187374	0.042349	0.227885	0.00792375	0.201337	0.0447094	0.232787	0.00689933	0.20697	0.0501481	0.236666	0.00690263	0.217019	0.0536831	0.23826	0.00508263	0.224684	0.0495007	0.239717	0.00403303	0.228675	0.0465875	0.2419	0.00301449	0.225139	0.0474254	0.243748	0.002635	0.222192	0.0480883	0.245466	0.00190108	0.22056	0.0536103	0.246325	0.00119812	0.224833	0.0563804
Weight gain between 42 and 14 days	WG	0.236877	0.0467557	0.140877	0.0527471	0.180725	0.0102885	0.161707	0.061867	0.206581	0.00920741	0.166108	0.0570643	0.215486	0.00829187	0.178368	0.057421	0.221036	0.00737622	0.180464	0.0554585	0.22515	0.00778263	0.18972	0.0585521	0.22767	0.00745663	0.196569	0.0549847	0.229123	0.00582217	0.200184	0.0507269	0.232047	0.00393213	0.195366	0.0484741	0.233946	0.00320475	0.195027	0.0471448	0.235679	0.00219708	0.194706	0.0508483	0.236497	0.00149567	0.19946	0.0527104
Metabolic weight	MW	0.259217	0.048263	0.164341	0.0589024	0.211473	0.00893788	0.185175	0.0562576	0.232297	0.00794452	0.195929	0.0607684	0.241321	0.00875812	0.211485	0.0593566	0.245995	0.0084234	0.220266	0.0562939	0.249404	0.0071298	0.230774	0.0517088	0.25063	0.00598747	0.239812	0.0504135	0.252471	0.00593595	0.243746	0.0493661	0.254654	0.00538639	0.241333	0.0489082	0.256618	0.00363778	0.237683	0.0498895	0.258253	0.00258406	0.237801	0.0511571	0.259263	0.00152411	0.242538	0.0513035
Breast muscle weight	BMW	0.394827	0.0341354	0.380502	0.0399783	0.345251	0.0128345	0.384689	0.036391	0.365956	0.00750932	0.388316	0.0356252	0.373795	0.00669233	0.392281	0.0308112	0.379648	0.00543757	0.397444	0.0286634	0.383411	0.00437349	0.402617	0.0272588	0.385758	0.00488994	0.401758	0.0309562	0.387834	0.00437482	0.396107	0.0338901	0.390516	0.00395169	0.392131	0.0334215	0.391752	0.00320378	0.376143	0.0349784	0.392988	0.00231543	0.353255	0.0359712	0.394365	0.00145968	0.347248	0.035708
Keel length	KL	0.281107	0.0399413	0.225545	0.0433507	0.245784	0.0155656	0.238329	0.0465528	0.261078	0.0103844	0.238846	0.0479647	0.267708	0.00744621	0.255405	0.0484238	0.272696	0.00590211	0.259457	0.0467222	0.274955	0.00586803	0.269334	0.0475255	0.275824	0.00510767	0.275724	0.0510492	0.277751	0.00479223	0.269934	0.0602593	0.280052	0.00343628	0.264534	0.0591871	0.280073	0.00295187	0.254798	0.0563099	0.280318	0.00206126	0.247416	0.0527554	0.280946	0.00102128	0.247716	0.0503703
Breast muscle thickness	BMT	0.16403	0.0220433	0.204494	0.0230475	0.146895	0.0107746	0.186054	0.0136516	0.152804	0.00650365	0.192079	0.0127099	0.15619	0.00691475	0.194235	0.0237238	0.158256	0.00590543	0.187515	0.0214409	0.159091	0.00484349	0.190116	0.0180004	0.159369	0.00416289	0.187962	0.0131588	0.160101	0.00409937	0.170217	0.010891	0.161763	0.00352092	0.160268	0.0173046	0.162754	0.00272052	0.150934	0.0246131	0.163221	0.00163206	0.145378	0.0304192	0.163854	0.000999842	0.146053	0.0294604
Breast muscle volume	BMV	0.214366	0.037612	0.226692	0.0448521	0.182424	0.0144412	0.217028	0.0401428	0.193482	0.0072253	0.222112	0.0446769	0.199543	0.00779326	0.224297	0.0305967	0.20311	0.00511019	0.223601	0.03514	0.206674	0.00407534	0.235447	0.0349686	0.207327	0.00348094	0.238608	0.0383358	0.209624	0.00422734	0.233895	0.0456558	0.211801	0.00397119	0.229034	0.0478194	0.212732	0.00338827	0.211087	0.0489359	0.21334	0.00200737	0.191214	0.0511005	0.214207	0.00146807	0.18633	0.0495052
Feed intake	FI	0.294064	0.043406	0.190128	0.0582931	0.25395	0.0134604	0.212689	0.0672964	0.273583	0.00982913	0.21819	0.0658656	0.281196	0.00943895	0.224369	0.0698267	0.285342	0.00949966	0.234685	0.0666209	0.286616	0.0094711	0.248092	0.0669765	0.287684	0.00871958	0.2653	0.0603226	0.288248	0.00707935	0.274893	0.0523895	0.291228	0.00434184	0.277241	0.0463943	0.29235	0.00330351	0.277709	0.0419765	0.293675	0.00211698	0.279668	0.0406703	0.294198	0.00163456	0.279875	0.0415723
Feed conversation rate	FCR	0.49766	0.0525447	0.419564	0.0485058	0.435429	0.0093849	0.452271	0.0555608	0.456107	0.00782083	0.461772	0.0507272	0.465089	0.00772265	0.475582	0.048804	0.471255	0.00641059	0.482457	0.0477679	0.474348	0.00650505	0.493549	0.0542961	0.477695	0.00654173	0.501475	0.0547614	0.480512	0.0050888	0.500142	0.0567378	0.486268	0.00387675	0.486987	0.0566537	0.49088	0.00316502	0.477735	0.0567027	0.494267	0.00201906	0.469301	0.0617184	0.496686	0.00141083	0.472327	0.0632814
Resedual feed intake1	RFI1	0.370778	0.0481477	0.302704	0.0471892	0.338139	0.0108594	0.32783	0.0465017	0.35298	0.00830678	0.331442	0.0452244	0.359099	0.00575569	0.333723	0.0423502	0.362706	0.00516211	0.343369	0.0464627	0.363377	0.00484643	0.354868	0.0512244	0.364285	0.00401856	0.366538	0.0532059	0.365764	0.00355656	0.370966	0.0527301	0.368607	0.0029772	0.368351	0.0522969	0.369435	0.0016016	0.363287	0.0516246	0.370402	0.00159008	0.360464	0.0505897	0.370782	0.00126302	0.359068	0.051934
Resedual feed intake2	RFI2	0.387006	0.0491808	0.331648	0.0508764	0.354155	0.0112583	0.353576	0.0509886	0.368873	0.0076159	0.356701	0.0484387	0.374755	0.00545849	0.359204	0.0443182	0.378159	0.00502445	0.367854	0.0479988	0.378887	0.00466624	0.377089	0.0518132	0.37987	0.00384326	0.385905	0.0541184	0.381656	0.00359481	0.38791	0.0543366	0.384688	0.00293653	0.384469	0.0542139	0.385547	0.00158099	0.377933	0.0536679	0.386545	0.00149689	0.372558	0.051819	0.387012	0.00116405	0.370614	0.0527024
	Average	0.305229	0.041982	0.248084	0.0459643	0.262685	0.0116514	0.262638	0.0451572	0.280484	0.00836034	0.268587	0.0461776	0.287839	0.00735756	0.277201	0.0450057	0.292378	0.00644617	0.282947	0.0447754	0.294871	0.0060549	0.292315	0.0456831	0.296382	0.00552467	0.299441	0.0451343	0.29826	0.00490139	0.29827	0.0456293	0.30118	0.00386858	0.293162	0.0454294	0.302774	0.0028799	0.28533	0.0457626	0.304064	0.00200222	0.27865	0.0473497	0.305031	0.00134201	0.279159	0.0477888
Note: SD represents the standard deviations of five fold cross validation for each trait.
[truncated: 22 more columns]

## Sheet: TableS7
Table S7 Genomic prediction by incorporating eQTLs prior information of seven duck tissues.
Traits	Abbreviations	BayesR		BayesRC with cis-eQTLs														BayesRC with eGenes
				Muscle		Adipose		Liver		Blood		Spleen		Lung		Ovary		Muscle		Adipose		Liver		Blood		Spleen		Lung		Ovary
		Reliability	SD	Reliability	SD	Reliability	SD	Reliability	SD	Reliability	SD	Reliability	SD	Reliability	SD	Reliability	SD	Reliability	SD	Reliability	SD	Reliability	SD	Reliability	SD	Reliability	SD	Reliability	SD	Reliability	SD
Body weight at 14 days	BW14	0.380335	0.0455695	0.378442	0.0390958	0.381459	0.0401537	0.38063	0.0446223	0.386209	0.0487231	0.383006	0.041872	0.379763	0.0494229	0.371951	0.0548785	0.394459	0.0473938	0.385647	0.0452445	0.386231	0.0319709	0.392571	0.0472076	0.387718	0.0396146	0.381367	0.0463816	0.383744	0.0437326
Body weight at 42 days	BW42	0.277608	0.035111	0.279599	0.0701291	0.253318	0.0331699	0.274091	0.0263525	0.291804	0.0597428	0.280337	0.0284325	0.264782	0.0221716	0.281132	0.0369491	0.292294	0.036581	0.285448	0.0352954	0.284185	0.0515742	0.279892	0.0379092	0.281882	0.039018	0.289688	0.0311551	0.281509	0.0234931
Weight gain between 42 and 14 days	WG	0.283319	0.046247	0.300984	0.0404333	0.287291	0.0552637	0.285164	0.0428816	0.284819	0.0541278	0.300582	0.0413733	0.293173	0.0458194	0.2868	0.0451383	0.276991	0.0433288	0.287728	0.0542881	0.274505	0.0457618	0.283922	0.0472063	0.279739	0.024113	0.27296	0.039308	0.28311	0.0345882
Metabolic weight	MW	0.286735	0.0444201	0.285815	0.0811057	0.287006	0.0786801	0.28662	0.080358	0.287622	0.0784392	0.287257	0.0787155	0.287323	0.0788669	0.284807	0.0808309	0.286559	0.077824	0.287376	0.0782768	0.284906	0.0786418	0.281351	0.0784053	0.284878	0.0787063	0.284881	0.0774626	0.280118	0.0772685
Breast muscle weight	BMW	0.441189	0.0223991	0.43934	0.0305705	0.441832	0.0213407	0.436782	0.0198358	0.436719	0.0184447	0.439441	0.0283163	0.44913	0.0211037	0.441213	0.0246911	0.445886	0.0245635	0.429572	0.0235581	0.430394	0.0210956	0.434557	0.0207169	0.448486	0.0213115	0.441955	0.0226823	0.440967	0.0227409
Keel length	KL	0.339615	0.0387218	0.34431	0.0399897	0.329002	0.0412702	0.334916	0.0325116	0.334745	0.043553	0.32967	0.0430637	0.328889	0.0426688	0.330534	0.0410255	0.329221	0.0414125	0.339561	0.0397478	0.322108	0.0420877	0.338464	0.029649	0.335007	0.0497895	0.329498	0.0380933	0.342361	0.0414856
Breast muscle thickness	BMT	0.25309	0.0194934	0.253907	0.0266934	0.269877	0.0205289	0.258733	0.0177131	0.257966	0.0117825	0.25746	0.023592	0.25944	0.0174532	0.258046	0.026563	0.261121	0.0240203	0.255012	0.0183156	0.252969	0.0236181	0.257454	0.0235134	0.255589	0.0116131	0.245522	0.0199242	0.248601	0.0230054
Breast muscle volume	BMV	0.326062	0.0317171	0.32321	0.0322482	0.328388	0.031079	0.328826	0.0216391	0.323352	0.0338258	0.326842	0.0284755	0.329233	0.0334496	0.322267	0.0360587	0.336924	0.0298359	0.328982	0.0291481	0.311866	0.0229171	0.318191	0.0299166	0.331418	0.0268471	0.334133	0.0338557	0.322262	0.0364185
Feed intake	FI	0.316739	0.0346017	0.310907	0.0310414	0.316078	0.0364559	0.300491	0.0414184	0.31055	0.0350501	0.315526	0.042579	0.31581	0.0356271	0.315061	0.0341518	0.308673	0.0378577	0.314891	0.0333034	0.319324	0.0509064	0.305582	0.037077	0.310452	0.0387788	0.307737	0.0351286	0.313471	0.0335942
Feed conversation rate	FCR	0.550582	0.0500093	0.543298	0.0423261	0.531179	0.0547038	0.530326	0.0316483	0.545817	0.0418302	0.553244	0.0438481	0.536865	0.0475703	0.539862	0.0479566	0.550534	0.0432452	0.553011	0.0378264	0.551066	0.047464	0.551087	0.0457556	0.55181	0.0469035	0.54646	0.0341526	0.547948	0.0502955
Resedual feed intake1	RFI1	0.389697	0.0468909	0.384558	0.0478526	0.364695	0.0726306	0.380792	0.0499535	0.380748	0.0402796	0.368754	0.0569633	0.391247	0.0484202	0.388366	0.0451023	0.375123	0.050987	0.390714	0.0446014	0.390357	0.0480007	0.390498	0.0473813	0.392785	0.042062	0.382793	0.059079	0.38158	0.0405658
Resedual feed intake2	RFI2	0.412502	0.0480317	0.418131	0.0476053	0.382557	0.0490965	0.40563	0.0487825	0.400428	0.0478422	0.414667	0.0399834	0.404838	0.0567381	0.409258	0.0608787	0.423143	0.0440381	0.421836	0.0567138	0.422204	0.0524159	0.417131	0.0490928	0.397963	0.0605067	0.40215	0.035521	0.417751	0.0480544
	Avarege	0.354789	0.0386011	0.355208	0.0440909	0.347723	0.0445311	0.35025	0.0381431	0.353398	0.0428034	0.354732	0.0414345	0.353375	0.0416093	0.352441	0.0445187	0.356744	0.0417573	0.356648	0.0413599	0.35251	0.0430378	0.354225	0.0411526	0.354811	0.0399387	0.351595	0.0393953	0.353619	0.0396036
Note: SD represents the standard deviations of five fold cross validation for each trait.
